# Supplementary material for: Predictive modeling of gene mutations for the survival outcomes of epithelial ovarian cancer patients
Source: PubMed Central journal article supplement (PMC11230535; doi:10.1371/journal.pone.0305273), 2024-07-08
Supplement: pone.0305273.s001.pdf [file pone.0305273.s001.pdf]

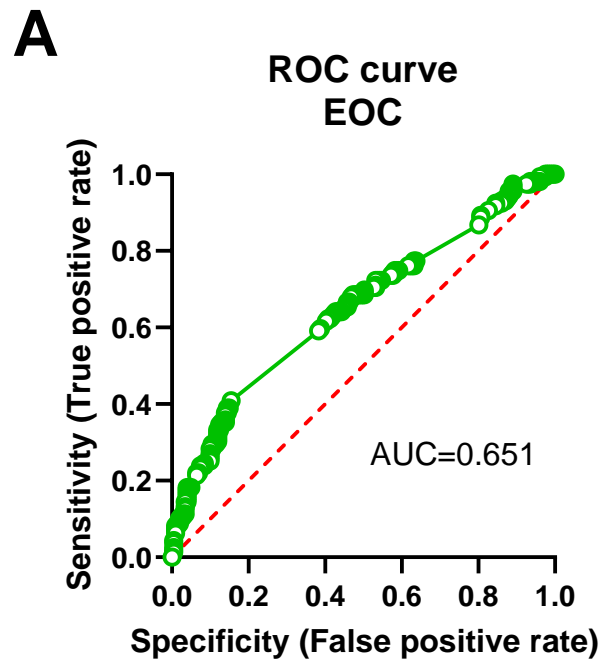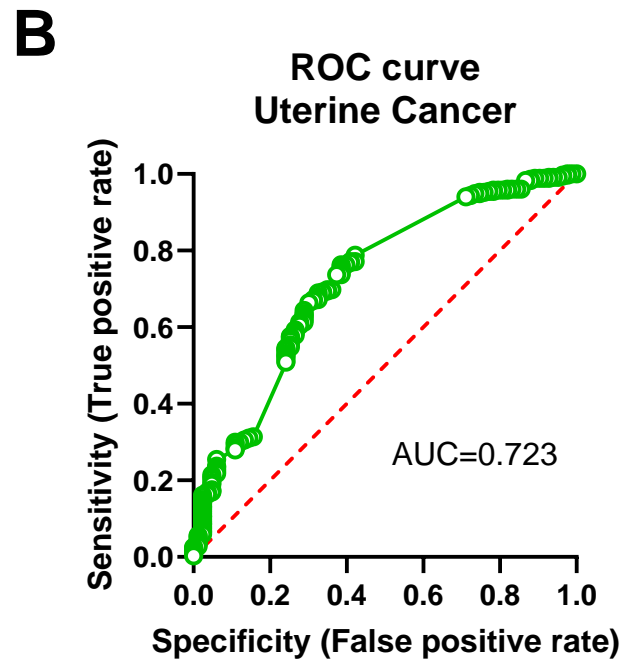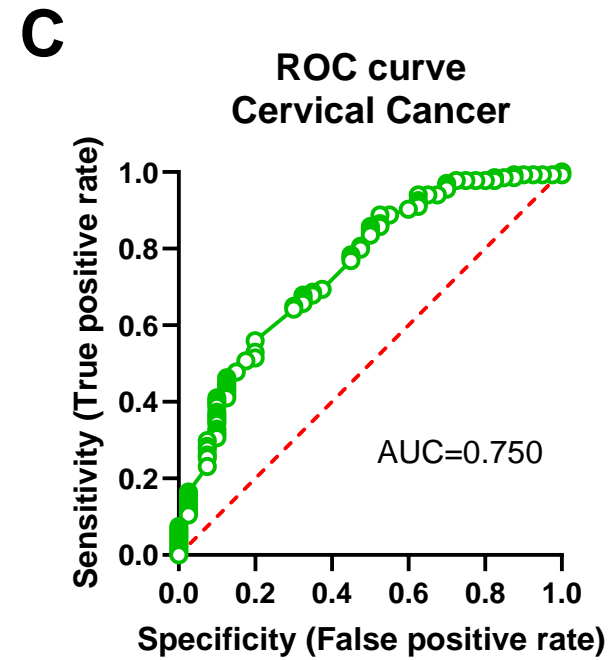

**S1 Fig. Performance of logistic regression modeling.** The area under the ROC curve is used to evaluate the performance of the logistic regression models for EOC (A), uterine cancer (B), and cervical cancer (C).
