# Supplementary material for: Predictive modeling of gene mutations for the survival outcomes of epithelial ovarian cancer patients
Source: PubMed Central journal article supplement (PMC11230535; doi:10.1371/journal.pone.0305273), 2024-07-08
Supplement: pone.0305273.s003.pdf [file pone.0305273.s003.pdf]

**S1 Table. Logistic regression analysis of 23 gene mutations and survival outcomes in 491 uterine cancer patients. Blue, positive genes; Red, negative genes.**

| <b>Variable</b>  | <b>Estimate</b> | <b>Estimate<br/>95% CI</b> | <b>Odd ratio</b> | <b>Odd ratio<br/>95% CI</b> |
|------------------|-----------------|----------------------------|------------------|-----------------------------|
| <b>Intercept</b> | 1.658 ± 0.415   | 0.8501 to 2.483            | 5.25             | 2.340 to 11.97              |
| <b>ATM</b>       | 1.575 ± 0.724   | 0.298 to 3.200             | 4.83             | 1.348 to 24.54              |
| <b>FANCD2</b>    | 1.444 ± 1.327   | -0.740 to 4.749            | 4.24             | 0.477 to 115.4              |
| <b>BRCA1</b>     | 0.979 ± 1.221   | -1.061 to 4.100            | 2.66             | 0.346 to 60.36              |
| <b>MSH6</b>      | 0.609 ± 0.852   | -0.883 to 2.599            | 1.84             | 0.413 to 13.45              |
| <b>CHEK2</b>     | 0.581 ± 1.145   | -1.326 to 3.599            | 1.79             | 0.266 to 36.58              |
| <b>MUC16</b>     | 0.521 ± 0.408   | -0.248 to 1.365            | 1.68             | 0.780 to 3.915              |
| <b>FAT4</b>      | 0.512 ± 0.452   | -0.332 to 1.454            | 1.67             | 0.717 to 4.280              |
| <b>PTEN</b>      | 0.291 ± 0.387   | -0.464 to 1.058            | 1.34             | 0.629 to 2.879              |
| <b>FAT1</b>      | 0.281 ± 0.466   | -0.591 to 1.256            | 1.32             | 0.554 to 3.511              |
| <b>KRAS</b>      | 0.236 ± 0.410   | -0.537 to 1.083            | 1.27             | 0.585 to 2.953              |
| <b>ATR</b>       | 0.212 ± 0.625   | -0.952 to 1.542            | 1.24             | 0.386 to 4.672              |
| <b>MLH1</b>      | 0.202 ± 0.892   | -1.382 to 2.255            | 1.22             | 0.251 to 9.536              |
| <b>KMT2C</b>     | 0.068 ± 0.452   | -0.778 to 1.011            | 1.07             | 0.459 to 2.749              |
| <b>MSH2</b>      | 0.058 ± 1.208   | -2.071 to 3.128            | 1.06             | 0.126 to 22.83              |
| <b>NBN</b>       | -0.383 ± 0.985  | -2.164 to 1.823            | 0.68             | 0.115 to 6.188              |
| <b>CSMD3</b>     | -0.418 ± 0.356  | -1.105 to 0.298            | 0.66             | 0.331 to 1.348              |
| <b>FANCE</b>     | -0.610 ± 1.006  | -2.445 to 1.630            | 0.54             | 0.0867 to 5.105             |
| <b>PMS2</b>      | -0.656 ± 0.800  | -2.153 to 1.073            | 0.52             | 0.116 to 2.925              |
| <b>NF1</b>       | -0.749 ± 0.531  | -1.768 to 0.340            | 0.47             | 0.171 to 1.405              |
| <b>TP53</b>      | -0.785 ± 0.391  | -1.552 to -0.0152          | 0.46             | 0.212 to 0.985              |
| <b>FAT3</b>      | -1.031 ± 0.442  | -1.890 to -0.144           | 0.36             | 0.151 to 0.866              |
| <b>BRIP1</b>     | -1.277 ± 0.581  | -2.418 to -0.106           | 0.28             | 0.0891 to 0.899             |
| <b>CDK12</b>     | -1.711 ± 0.740  | -3.188 to -0.236           | 0.18             | 0.0413 to 0.790             |
