# Supplementary material for: Predictive modeling of gene mutations for the survival outcomes of epithelial ovarian cancer patients
Source: PubMed Central journal article supplement (PMC11230535; doi:10.1371/journal.pone.0305273), 2024-07-08
Supplement: pone.0305273.s004.pdf [file pone.0305273.s004.pdf]

**S2 Table. Classification metrics for evaluation of the predictive model for the survival outcomes of uterine cancer patients.**

|                     | <b>Predicted dead (number of patients)</b> | <b>Predicted alive (number of patients)</b> | <b>Accuracy (%)</b> | <b>Precision (%)</b> | <b>Recall (%)</b> |
|---------------------|--------------------------------------------|---------------------------------------------|---------------------|----------------------|-------------------|
| <b>Actual dead</b>  | 6                                          | 77                                          | 81.5                | 82.0                 | 98.9              |
| <b>Actual alive</b> | 4                                          | 350                                         |                     |                      |                   |
