# Supplementary material for: Predictive modeling of gene mutations for the survival outcomes of epithelial ovarian cancer patients
Source: PubMed Central journal article supplement (PMC11230535; doi:10.1371/journal.pone.0305273), 2024-07-08
Supplement: pone.0305273.s005.pdf [file pone.0305273.s005.pdf]

**S3 Table. Logistic regression analysis of 21 gene mutations and survival outcomes in 174 cervical cancer patients. Blue, positive genes; Red, negative genes.**

| <b>Variable</b>  | <b>Estimate</b> | <b>Estimate<br/>95% CI</b> | <b>Odd ratio</b> | <b>Odd Ratio<br/>95% CI</b> |
|------------------|-----------------|----------------------------|------------------|-----------------------------|
| <b>CSMD3</b>     | 2.678 ± 1.451   | 0.447 to 6.461             | 14.55            | 1.564 to 639.5              |
| <b>FAT1</b>      | 1.385 ± 0.819   | -0.0236 to 3.342           | 4.00             | 0.977 to 28.28              |
| <b>Intercept</b> | 1.278 ± 0.372   | 0.562 to 2.035             | 3.59             | 1.754 to 7.649              |
| <b>BRCA1</b>     | 1.276 ± 1.116   | -0.540 to 4.264            | 3.58             | 0.583 to 71.11              |
| <b>PALB2</b>     | 1.098 ± 1.557   | -1.764 to 4.749            | 3.00             | 0.171 to 115.4              |
| <b>NF1</b>       | 0.739 ± 0.916   | -0.882 to 2.869            | 2.09             | 0.414 to 17.62              |
| <b>RB1</b>       | 0.584 ± 0.802   | -0.885 to 2.337            | 1.79             | 0.413 to 10.35              |
| <b>BRIP1</b>     | 0.322 ± 1.259   | -1.933 to 3.449            | 1.38             | 0.145 to 31.46              |
| <b>ATM</b>       | 0.285 ± 0.909   | -1.434 to 2.246            | 1.33             | 0.238 to 9.453              |
| <b>FAT4</b>      | 0.194 ± 0.690   | -1.089 to 1.677            | 1.21             | 0.336 to 5.349              |
| <b>PTEN</b>      | 0.193 ± 0.654   | -1.024 to 1.599            | 1.21             | 0.359 to 4.946              |
| <b>KMT2C</b>     | -0.114 ± 0.459  | -1.007 to 0.805            | 0.89             | 0.365 to 2.236              |
| <b>MUC16</b>     | -0.315 ± 0.432  | -1.162 to 0.543            | 0.73             | 0.313 to 1.720              |
| <b>KRAS</b>      | -0.462 ± 0.663  | -1.741 to 0.901            | 0.63             | 0.175 to 2.462              |
| <b>ATR</b>       | -0.537 ± 0.827  | -2.131 to 1.215            | 0.58             | 0.119 to 3.371              |
| <b>NBN</b>       | -0.659 ± 1.382  | -3.367 to 2.595            | 0.52             | 0.0345 to 13.40             |
| <b>FAT3</b>      | -0.696 ± 0.732  | -2.109 to 0.833            | 0.50             | 0.121 to 2.299              |
| <b>TP53</b>      | -0.728 ± 0.614  | -1.928 to 0.521            | 0.48             | 0.146 to 1.684              |
| <b>CDK12</b>     | -0.994 ± 0.657  | -2.303 to 0.315            | 0.37             | 0.0999 to 1.370             |
| <b>BRCA2</b>     | -1.137 ± 0.900  | -2.938 to 0.702            | 0.32             | 0.0530 to 2.017             |
| <b>FANCD2</b>    | -1.188 ± 1.124  | -3.507 to 1.176            | 0.30             | 0.0300 to 3.243             |
| <b>MLH1</b>      | -1.996 ± 1.358  | -5.245 to 0.597            | 0.14             | 0.00528 to 1.816            |
