# Supplementary material for: Predictive modeling of gene mutations for the survival outcomes of epithelial ovarian cancer patients
Source: PubMed Central journal article supplement (PMC11230535; doi:10.1371/journal.pone.0305273), 2024-07-08
Supplement: pone.0305273.s006.pdf [file pone.0305273.s006.pdf]

**S4 Table. Classification metrics for evaluation of the predictive model for the survival outcomes of cervical cancer patients.**

|                     | <b>Predicted dead (number of patients)</b> | <b>Predicted alive (number of patients)</b> | <b>Accuracy (%)</b> | <b>Precision (%)</b> | <b>Recall (%)</b> |
|---------------------|--------------------------------------------|---------------------------------------------|---------------------|----------------------|-------------------|
| <b>Actual dead</b>  | 7                                          | 33                                          | 79.3                | 79.9                 | 97.8              |
| <b>Actual alive</b> | 3                                          | 131                                         |                     |                      |                   |
